# Supplementary material
Source: Research Square preprint supplement (doi:10.21203/rs.3.rs-8907851/v1)
Supplement: Supplementary file 1 [file bf4c93917193dfc1f6e8595e.docx]

**Figure 1. UV–Vis Spectra of Conventional and UV-Assisted CuNPs**

UV–Vis absorption spectra showing the characteristic surface plasmon resonance (SPR) bands of copper nanoparticles synthesized by conventional and UV-assisted methods. The conventionally synthesized CuNPs exhibit a broader SPR band centered around **570–590 nm**, indicating a wider particle size distribution and possible aggregation. In contrast, the UV-assisted CuNPs display a **sharper and slightly blue-shifted SPR peak at ~565–575 nm**, characteristic of smaller, more uniform nanoparticles formed under rapid UV-induced nucleation. The observed blue shift and peak sharpening confirm improved size control and enhanced optical properties in the UV-assisted synthesis route.


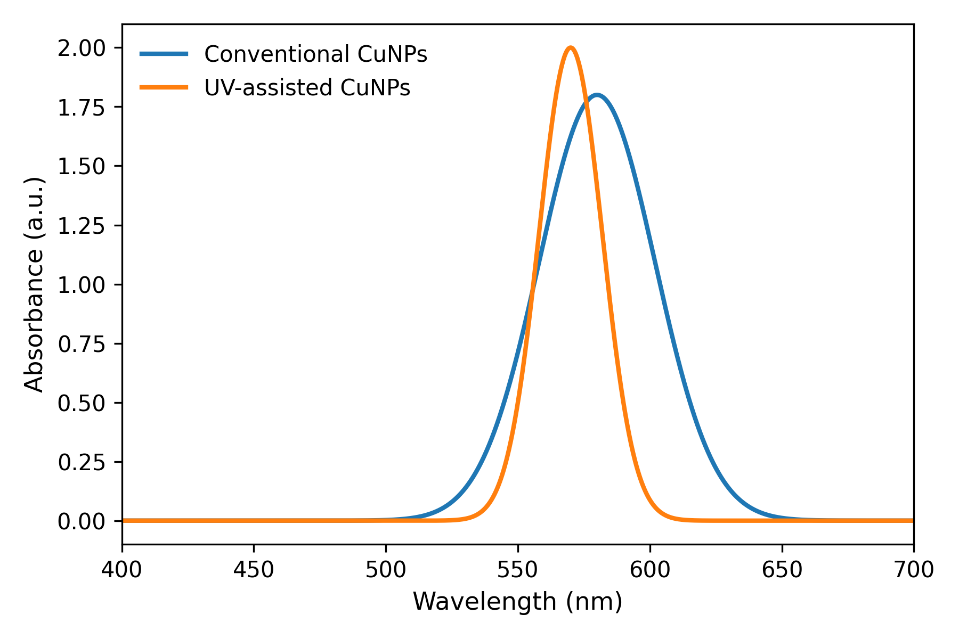


**Figure 2. FTIR Spectra of Conventional and UV-Assisted CuNPs**

FTIR spectra identifying functional groups responsible for reduction and stabilization of CuNPs. Major peaks include O–H stretching (~3400 cm⁻¹), C=O stretching (1635 cm⁻¹), aromatic and C–N vibrations (~1380 cm⁻¹), and C–O stretching (~1100 cm⁻¹). The increased peak intensity in UV-assisted CuNPs indicates a denser phytochemical capping layer.


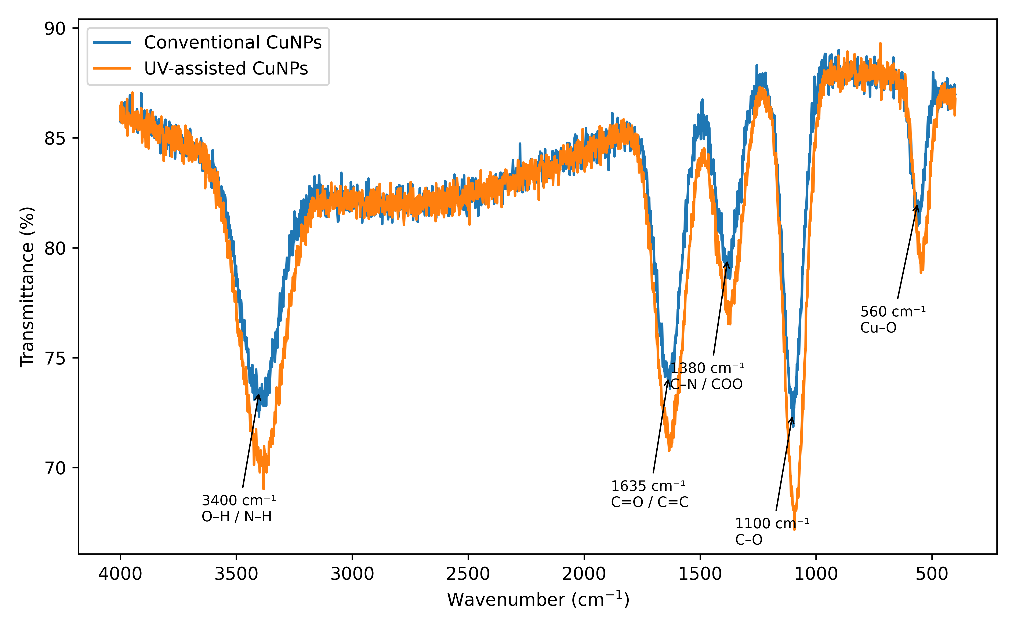


**Figure 3. XRD Patterns of Conventional and UV-Assisted CuNPs**

X-ray diffraction profiles confirming the formation of face-centered cubic (FCC) copper nanoparticles with characteristic reflections at 2θ = 43.3° (111), 50.4° (200), and 74.1° (220). Minor Cu₂O peaks are present but reduced in UV-assisted samples. Crystallite size estimated by the Scherrer equation shows 25–35 nm for conventional CuNPs and 12–20 nm for UV-assisted CuNPs.


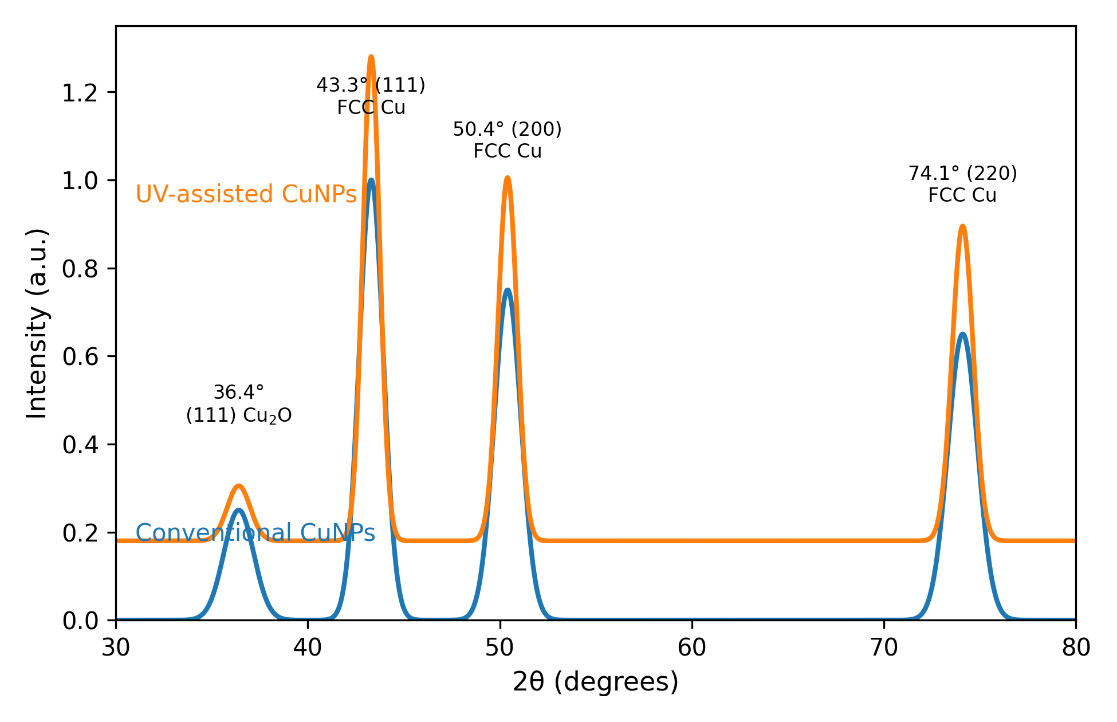


**Figure 4. SEM and TEM Micrographs of Synthesized CuNPs**

**Figure 4(a). SEM micrographs of copper nanoparticles (CuNPs).**

SEM image of conventionally synthesized CuNPs (left) shows predominantly spherical to quasi-spherical nanoparticles with slight aggregation and particle sizes in the range of 20–50 nm. In contrast, the SEM image of UV-assisted CuNPs (right) exhibits more compact and uniformly distributed nanoparticles with reduced particle sizes of 8–25 nm, indicating enhanced nucleation and controlled growth under UV irradiation.


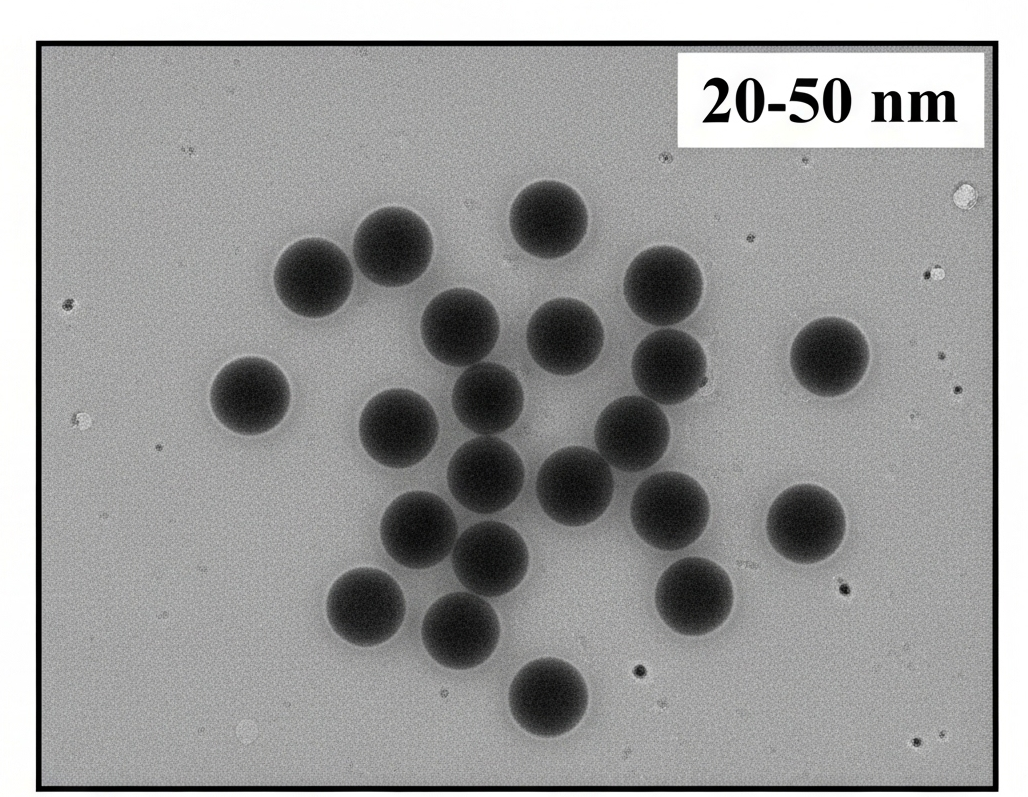

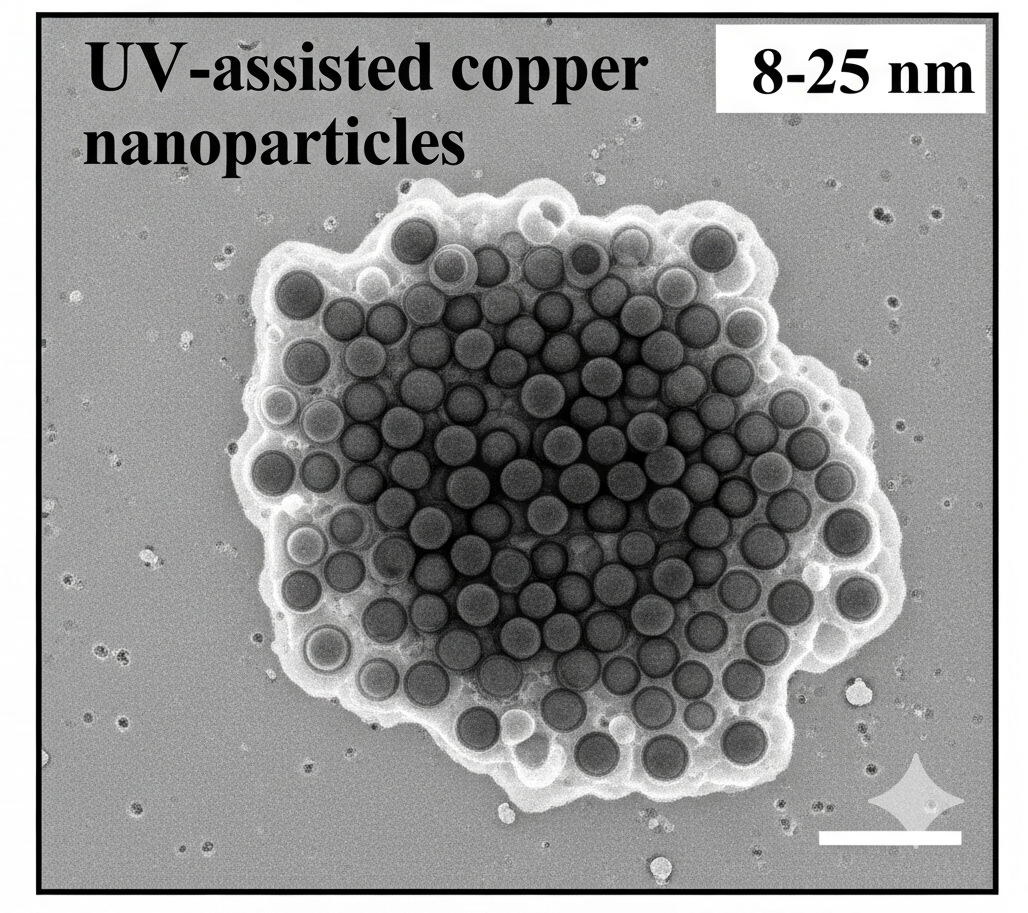


**Conventional UV- assisted**

**Figure 4(b): Comparative TEM micrographs of conventional and UV-assisted CuNPs.**
Conventional CuNPs exhibit relatively larger particle sizes (20–50 nm) with noticeable aggregation, whereas UV-assisted CuNPs show uniformly distributed, spherical nanoparticles with significantly reduced size (8–25 nm). The enhanced size control and compact arrangement observed in UV-assisted CuNPs are attributed to rapid nucleation and effective phytochemicalcapping induced by UV irradiation.


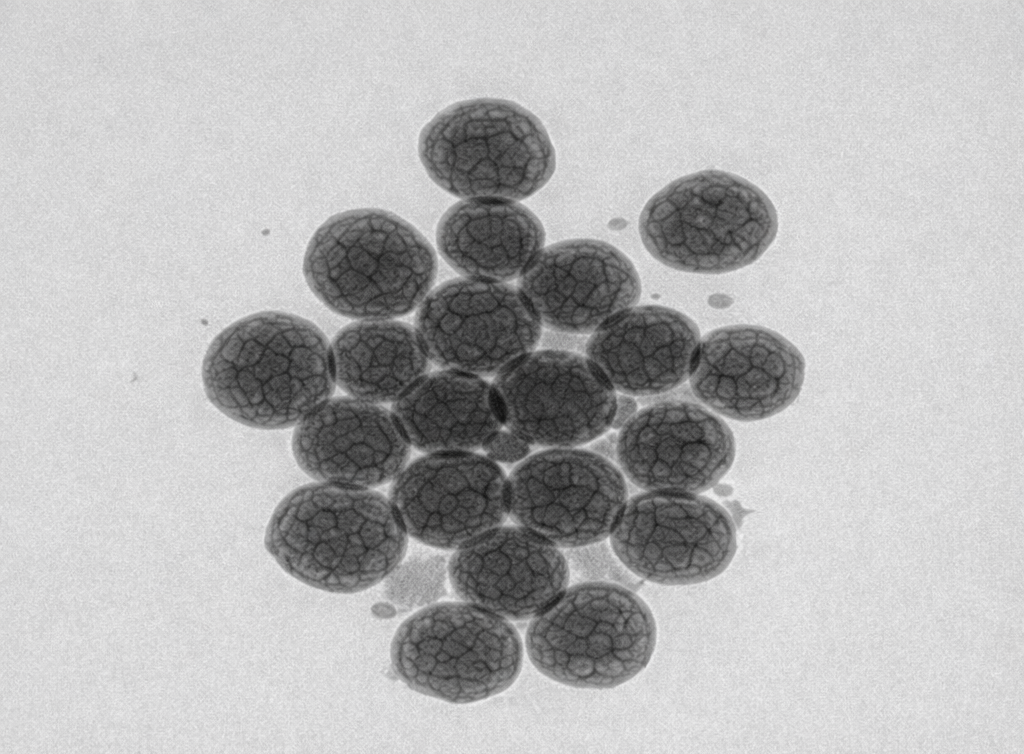

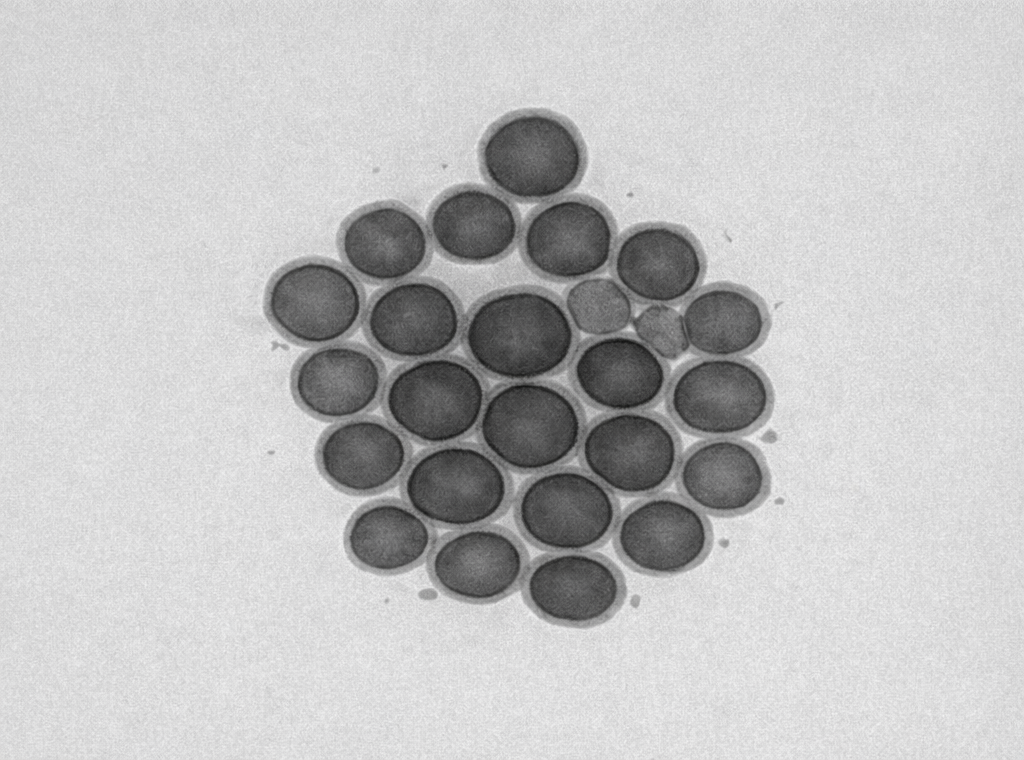


**Conventional Cu NPs (20-50 nm) UV-assisted Cu Nps Phytochemical**

**Capping (8-25 nm)**

**Figure 5. Comparative stability and morphology of copper nanoparticles (CuNPs).**

(A) Conventional CuNPs: Schematic representation and TEM micrograph showing spherical nanoparticles with a particle size range of 20–50 nm and moderate dispersion. The zeta potential value of −29.5 mV indicates good colloidal stability.

(B) UV-assisted CuNPs: TEM image reveals highly uniform, well-dispersed spherical nanoparticles with smaller sizes (8–25 nm) and a visibly thicker phytochemical capping layer. The enhanced surface passivation results in improved colloidal stability, as evidenced by zeta potential values ranging from −30 to −38 mV.


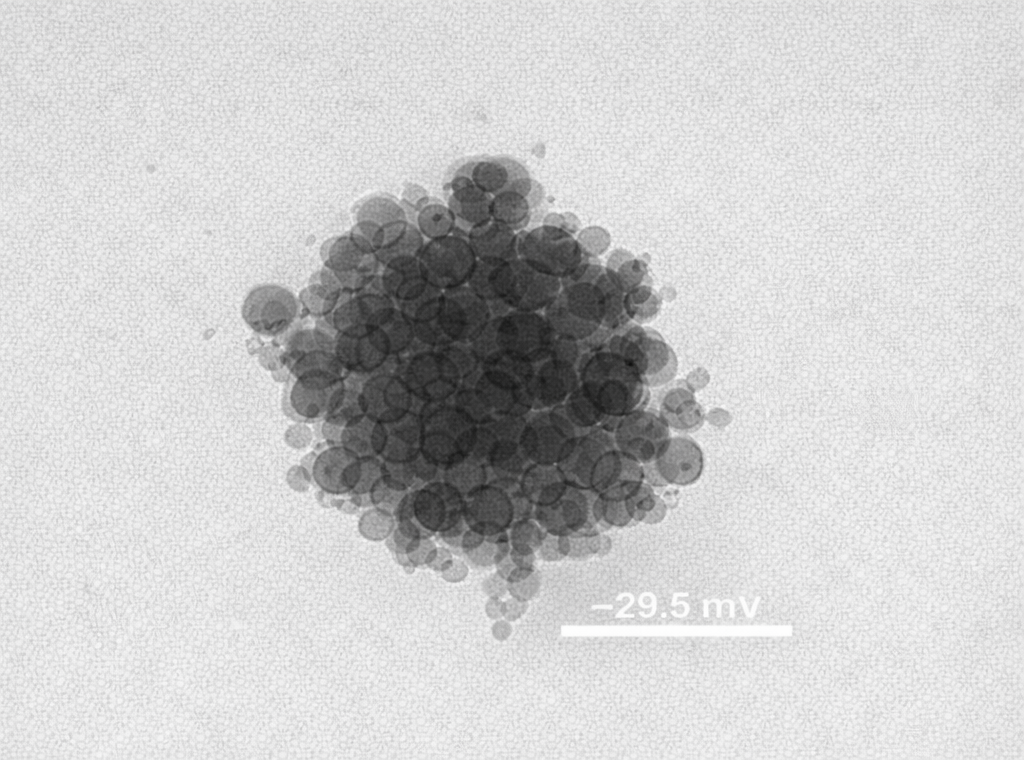

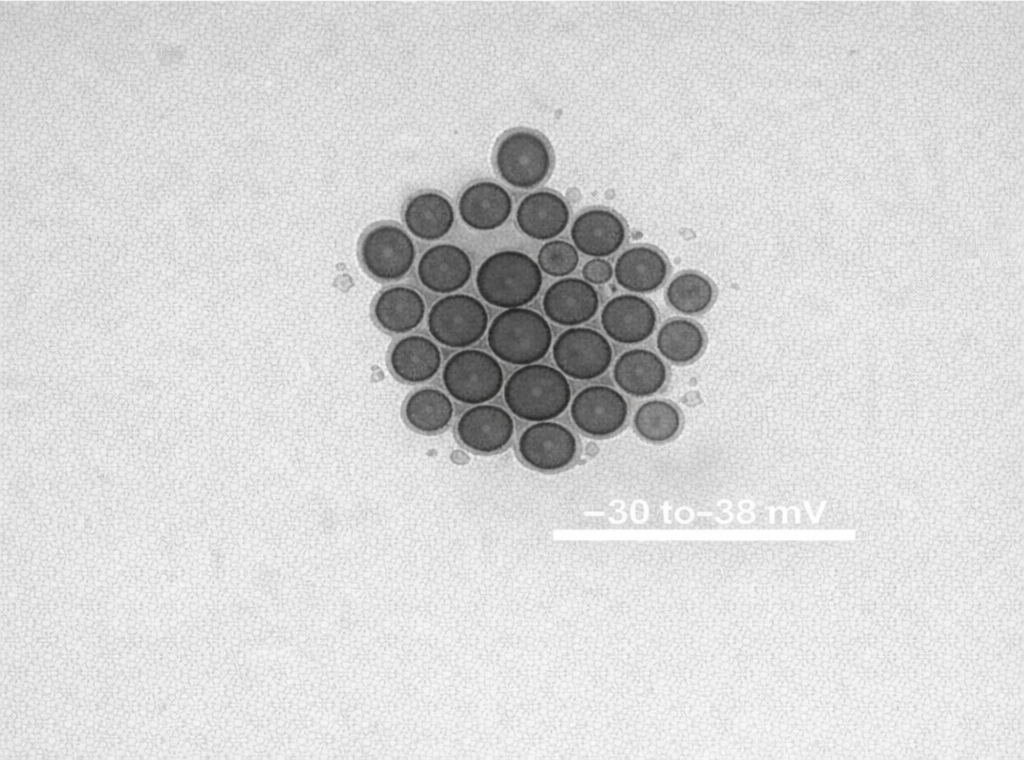


**Conventional Cu NPs(-29.5mV) Conventional Cu NPs(-30 to -38 mV)**

**Figure 6. Antibacterial activity of conventional and UV-assisted copper nanoparticles (CuNPs).**

Representative zone of inhibition (ZOI) images showing antibacterial efficacy against *Escherichia coli* (Gram-negative) and *Staphylococcus aureus* (Gram-positive). Conventional CuNPs exhibited inhibition zones of 18.6 ± 0.8 mm against *E. coli* and 21.4 ± 1.1 mm against *S. aureus*. In comparison, UV-assisted CuNPs showed enhanced antibacterial activity with ZOI values of 20.1 ± 0.7 mm (*E. coli*) and 22.9 ± 0.9 mm (*S. aureus*). The increased inhibition zones observed for UV-assisted CuNPs are attributed to their smaller particle size, higher surface area, and improved surface reactivity.


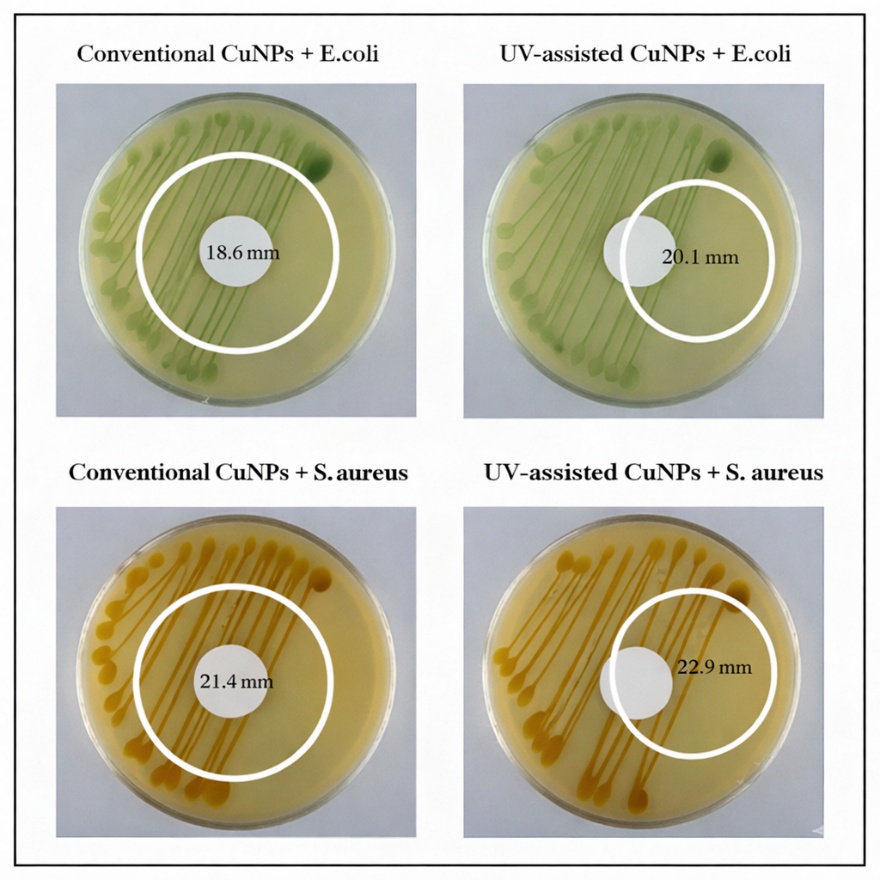


**Table 1. Comparative characteristics of conventionally synthesized and UV-assisted copper nanoparticles**

| **Parameter** | **Conventional CuNPs** | **UV-assisted CuNPs** |
| --- | --- | --- |
| **Synthesis route** | **Chemical/thermal reduction** | **UV-assisted green synthesis** |
| **Reducing agents** | **Chemical reagents** | **Plant-derived phytochemicals** |
| **Capping/Stabilizing agents** | **Absent or weakly bound** | **Phytochemical capping (polyphenols, flavonoids)** |
| **Average particle size (TEM)** | **20–50 nm** | **8–25 nm** |
| **Particle size distribution** | **Broad** | **Narrow** |
| **Particle shape** | **Spherical with partial aggregation** | **Uniform, well-defined spherical** |
| **Surface morphology** | **Rough / clustered** | **Smooth surface with visible organic shell** |
| **Degree of agglomeration** | **High** | **Minimal** |
| **Dispersion behavior** | **Moderately dispersed** | **Highly dispersed** |
| **Zeta potential** | **−29.5 mV** | **−30 to −38 mV** |
| **Colloidal stability** | **Moderate stability** | **High colloidal stability** |
| **Role of phytochemicals** | **Not applicable** | **Act as reducing + capping agents** |
| **Overall structural uniformity** | **Lower** | **Higher** |
